# Supplementary material
Source: PubMed Central journal article supplement (PMC3462293)

|                     |   |   |   |   |             |   |
|---------------------|---|---|---|---|-------------|---|
| UK-101 (1 $\mu$ M)  | - | + | - | + | Epx         | - |
| LKS01 (0.2 $\mu$ M) | - | - | + | + | (1 $\mu$ M) | - |

 $\beta$ 1i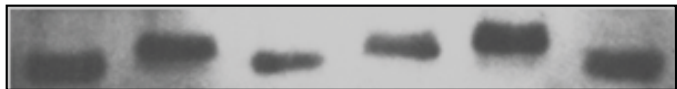 $\beta$ 5i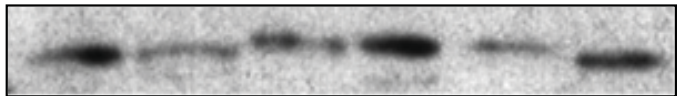 $\beta$ 1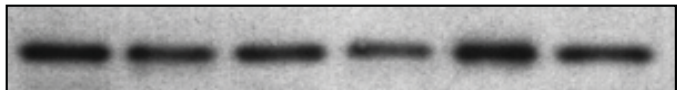 $\beta$ 5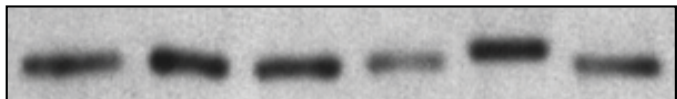

Panc-1

Supplement: NIHMS386917-supplement-ESI1.pdf [file NIHMS386917-supplement-ESI1.pdf]

## Panc-1

A

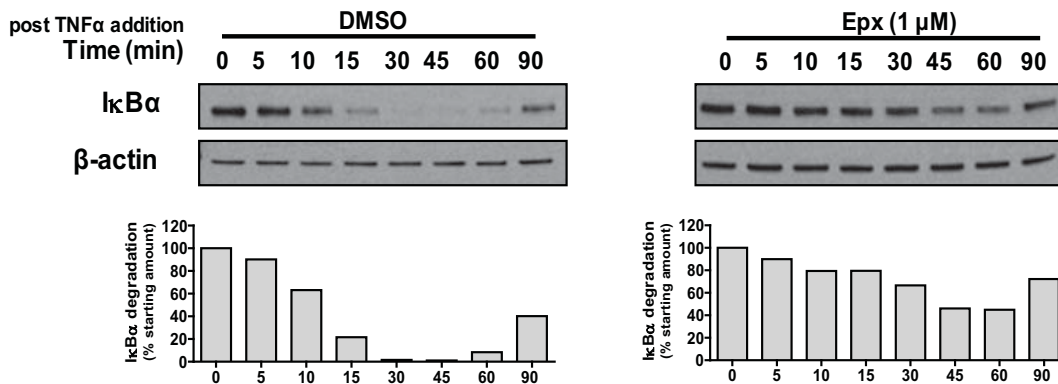

B

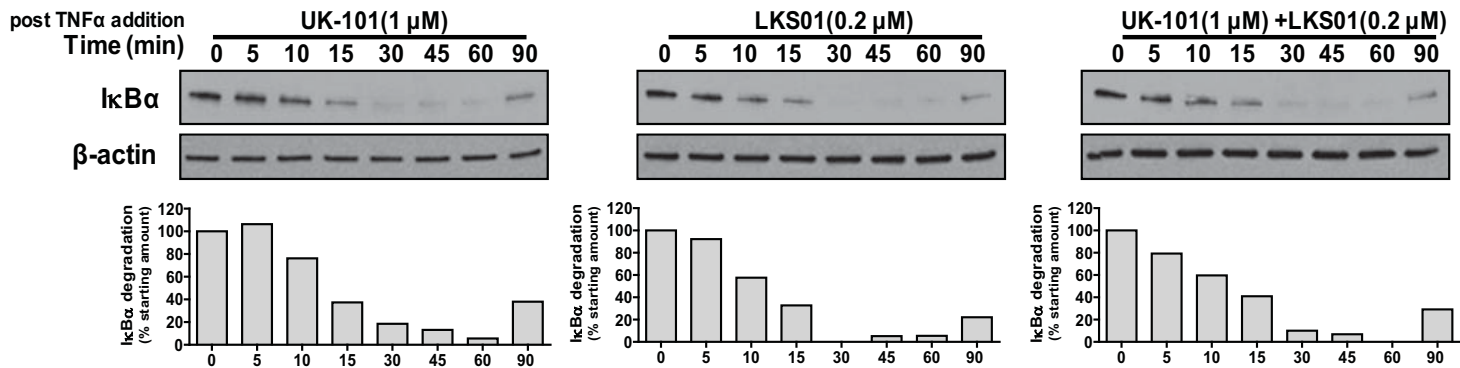

Supplement: NIHMS386917-supplement-ESI2.pdf [file NIHMS386917-supplement-ESI2.pdf]

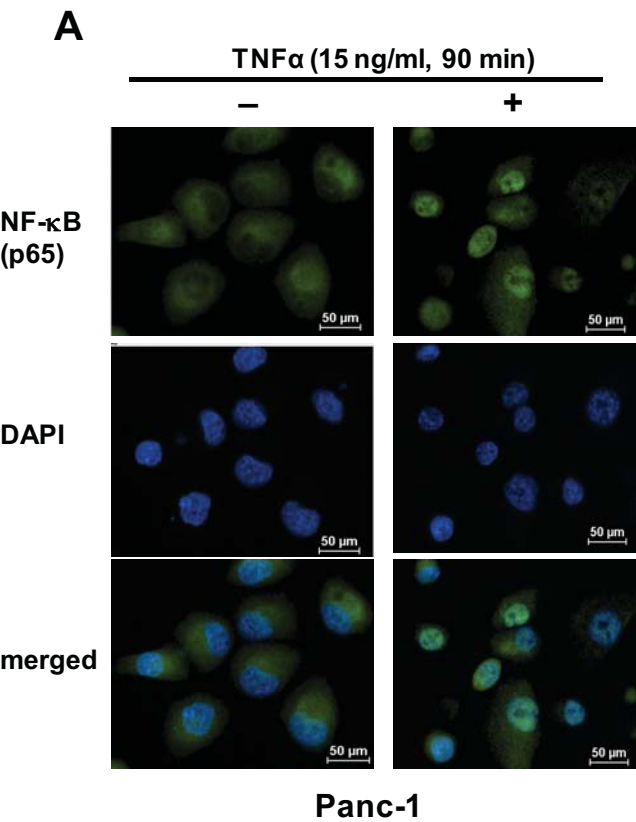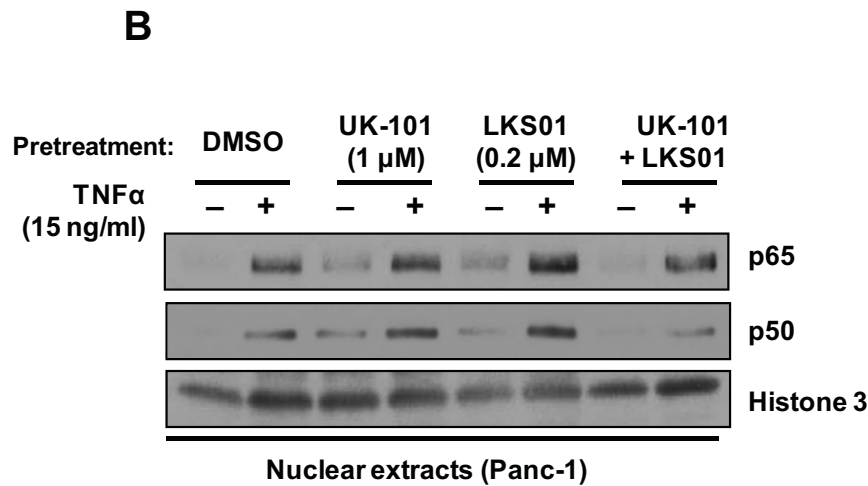

Supplement: NIHMS386917-supplement-ESI3.pdf [file NIHMS386917-supplement-ESI3.pdf]
